# Supplementary material for: Struktur und Einrichtung des Deutschen Cochlea-Implantat-Registers (DCIR)
Source: Springer Nature journal article supplement (doi:10.1007/s00106-023-01309-7), 2023-05-17
Supplement: MOESM1 [file 25372918]

# Datenblöcke CI-Register

## 1-3: Einmalig angelegte Datenblöcke

|                                                     |
|-----------------------------------------------------|
| <b>1. Basisdaten</b>                                |
| <u>ID (Code) Versorgende Einrichtung (Klinik):</u>  |
| <u>Patienten-ID Pseudonym:</u>                      |
| <u>Geburtsdatum: TT.MM.JJJJ</u>                     |
| <u>Sterbedatum: TT.MM.JJJJ</u>                      |
| <u>Geschlecht: W/M/D/ka</u>                         |
| <u>Muttersprache Deutsch: ja/nein/nicht erhoben</u> |

|                                                                                                             |
|-------------------------------------------------------------------------------------------------------------|
| <b>2. Präoperative Audiometrie (für jede Seite anzulegen)</b>                                               |
| <u>Seite: R/L</u>                                                                                           |
| <u>Tonaudiogramm LL/KL (125/250/500/750/1000/2000/4000/8000Hz): 0-120 dB HL / nicht bestimmbar</u>          |
| <u>Sprachtest:</u>                                                                                          |
| Freiburger, Hörverlust Zahlen (KH ohne HG, 50%, 100 dB SPL wenn unter 50%): 0-100 dB SPL / nicht erhoben    |
| <u>Freiburger Einsilber</u> (KH ohne HG <u>65</u> dB SPL): 0-100 % / nicht erhoben                          |
| <u>Freiburger Einsilber mEV</u> (KH ohne HG, mind. 95 dB SPL): 0-100 % / nicht erhoben                      |
| <u>Freiburger Einsilber</u> (FF, mit HG <u>65</u> dB SPL): 0-100 % / nicht erhoben                          |
| Mainzer Kindersprachtest (KH, ohne HG, I/II/III, 65 dB SPL): 0-100% / nicht erhoben                         |
| Mainzer Kindersprachtest (FF, mit HG, I/II/III, 65 dB SPL): 0-100% / nicht erhoben                          |
| Göttinger Sprachverständnistest (KH, ohne HG, I/II, 65 dB SPL): 0-100% / nicht erhoben                      |
| Göttinger Sprachverständnistest (FF, mit HG, I/II, 65 dB SPL): 0-100% / nicht erhoben                       |
| Reimtest OIKi in Ruhe (KH, ohne HG, 65 dB SPL): 0-100% / nicht erhoben                                      |
| Reimtest OIKi in Ruhe (FF, mit HG, 65 dB SPL): 0-100% / nicht erhoben                                       |
| <u>Satztests</u> (FF, S0N0) mit HG, Sprachpegel 65 dB SPL (Einfachauswahl)                                  |
| OISa in Ruhe: 0-100% / nicht erhoben                                                                        |
| OISa Schwelle im Störgeräusch (SRT50): -30 bis +30 dB SNR / nicht erhoben                                   |
| GöSa in Ruhe: 0-100% / nicht erhoben                                                                        |
| GöSa Schwelle im Störgeräusch (SRT50): -30 bis +30 dB SNR / nicht erhoben                                   |
| HSM in Ruhe: 0-100%/nicht erhoben                                                                           |
| HSM Störgeräusch: 0-100 %/nicht erhoben                                                                     |
| HSM SNR: -5, 0, +5, +10 dB/nicht erhoben                                                                    |
| OIKiSa in Ruhe: 0-100% / nicht erhoben                                                                      |
| OIKiSa im Störgeräusch (SRT50): -30 bis +30 dB / nicht erhoben                                              |
| <u>Objektive Messungen</u>                                                                                  |
| <u>OAE</u> (TEOAE/DPOAE) nachweisbar: ja / nein / nicht erhoben                                             |
| <u>BERA</u> nicht freq.-spezifisch (LL/KL): keine Reizantwort / Schwelle in dB nHL / nicht erhoben          |
| <u>BERA/ASSR</u> frequenz-spezifisch ( <u>500/4000Hz</u> ): keine Reizantwort / 0-120 dB HL / nicht erhoben |

|                                                                                                                                                                                                                                                                                                                                             |
|---------------------------------------------------------------------------------------------------------------------------------------------------------------------------------------------------------------------------------------------------------------------------------------------------------------------------------------------|
| <b>3.Präoperative Höranamnese (für jede Seite anzulegen)</b>                                                                                                                                                                                                                                                                                |
| Seite: <u>R/L</u>                                                                                                                                                                                                                                                                                                                           |
| <u>Zeitpunkt des Hörverlusts</u> : prälingual / perilingual / postlingual / nicht erhoben                                                                                                                                                                                                                                                   |
| <u>Hörverlust (CI-Ohr) in Jahren</u> : 0-1, 1-5, 5-10, 10-20, >20, nicht erhoben                                                                                                                                                                                                                                                            |
| <u>Taubheit (CI-Ohr) in Jahren</u> : 0-1, 1-5, 5-10, 10-20, >20, nicht erhoben                                                                                                                                                                                                                                                              |
| <u>Aktuell</u> Hörgerätenutzung im zu versorgenden Ohr: ja / nein                                                                                                                                                                                                                                                                           |
| Versorgung Gegenohr: Normalhörigkeit, Hörminderung (keine Vers., HG, KL-HG, IHG, CI, Sonstige, nicht erhoben)                                                                                                                                                                                                                               |
| <u>Ursache der Hörstörung</u> : bekannt: ja / nein / nicht erhoben (wenn ja, Mehrfachauswahl möglich):<br>genetisch, altersbedingt, syndromal, traumatisch, endokrinologisch, toxisch, infektiös, atypische Anatomie Innenohr, atypische Anatomie Hörnerv, atypische Anatomie zentrale Hörbahn, M. Meniere, Vestibularisneurinom, sonstige) |
| <u>Art der Hörstörung</u> : cochleär / neural / sonstige / nicht erhoben                                                                                                                                                                                                                                                                    |

#### **4-10: Mehrmalig angelegte Datenblöcke**

|                                                                                               |
|-----------------------------------------------------------------------------------------------|
| <b>4. Implantat (für jede Seite/jeden Eingriff anzulegen)</b>                                 |
| Seite: <u>R/L</u>                                                                             |
| <u>Implantationsdatum</u> : TT.MM.JJJJ                                                        |
| <u>Implantathersteller</u> (1: Advanced B., 2: Cochlear, 3: MedEl, 4: Oticon, 5: Andere): 1-5 |
| <u>Implantat-Bezeichnung</u> : <Liste, Sonstige>                                              |
| <u>Implantatseriennummer</u> :                                                                |
| <u>Explantation</u> : j/n                                                                     |
| <u>Explantationsdatum</u> : TT.MM.JJJJ                                                        |
| <u>Explantationsgrund nach Klassifikation</u> : (B1, B2, C, D, )                              |

|                                                                                                                                              |
|----------------------------------------------------------------------------------------------------------------------------------------------|
| <b>5. Operation (für jede Seite anzulegen)</b>                                                                                               |
| Seite: <u>R/L</u>                                                                                                                            |
| <u>Operationsdatum</u> : TT.MM.JJJJ                                                                                                          |
| <u>Operationsgrund</u> : 1: Primär-Operation / 2: Revisions-Operation: 1-2                                                                   |
| <u>Elektrodeninsertion</u> (1: Rundfenster / 2: Cochleostomie / 3: sonstige): 1-3                                                            |
| <u>Insertionstiefe</u> (1: partiell / 2: vollständig): 1-2                                                                                   |
| - <u>Intra-OP Funktionskontrollen (Elektrodenimpedanz und/oder E-CAP)</u> : regelhaft / nicht regelhaft / nicht erfolgt                      |
| <u>Durchführung radiologische Lagekontrolle Elektrode</u> : ja / nein                                                                        |
| wenn ja (1: regelrecht / 2: nicht regelrecht / 3: kA); und wenn ja welche Methode (1: konventionelles Röntgen/2: DVT/3: CT/4: sonstige): 1-4 |
| <u>Revisions-Operation</u> : J/N                                                                                                             |
| <u>Indikation Revisions-Operation</u> : medizinisch, technisch, sonstige, k.A.                                                               |
| <u>Klassifikation Implantatfunktion</u> : A-D                                                                                                |
| <u>Implantat-Status bei Revisions-Operation</u> 1: Gerät belassen / 2: Wechsel / 3: Explantation: 1-3                                        |
| <u>Falls Reimplantation</u> : 1,2...n-ter Implantatwechsel                                                                                   |

|                                                                                        |
|----------------------------------------------------------------------------------------|
| <b>6. CI-bezogene Komplikationen</b>                                                   |
| Seite: <u>R/L</u>                                                                      |
| <u>Revisionsbedürftige Fehllage der Elektrode</u> : j/n                                |
| <u>Fazialisparese</u> : House-Brackmann Grad I-VI                                      |
| <u>Stationäre Aufnahme war aufgrund CI-bezogener Komplikationen erforderlich</u> : j/n |
| <u>Meningitis nach CI-Versorgung</u> : j/n                                             |
| <u>Tod in Verbindung mit der CI-Versorgung</u> : j/n                                   |

|                                                                                                          |
|----------------------------------------------------------------------------------------------------------|
| <b>7. CI-Nutzung und Rehabilitationsfortschritt</b>                                                      |
| Seite: R/L                                                                                               |
| Implantatfunktion (Klassifikation nach Consensus 2005): A, B1, B2, C, E, nicht erhoben                   |
| CI-Nutzungsdauer (Zeit in Std/Tag): 0-24, kA                                                             |
| Nutzungsdauer erhoben durch (1: Patienten-/Elternangabe /2: data logging/ 3: kA): 1-3                    |
| Aktueller Rehabilitationsstatus:                                                                         |
| Prozessphase (1: Basistherapie /2: Folgetherapie / 3: Nachsorge / 4: unbekannt / 5: nicht erhoben): 1-5. |

|                                                                                                       |
|-------------------------------------------------------------------------------------------------------|
| <b>8. Postoperative Audiometrie</b>                                                                   |
| Seite: R/L                                                                                            |
| Zeit nach CI-Operation in Monaten: 0-XX (Automatisch)                                                 |
| Tonaudiogramm (unversorgt) LL/KL (125/250/500/750/1000/2000/4000/8000Hz): 0-120 dB / nicht bestimmbar |
| <u>Sprachtest</u> (mit CI, FF, Sprachpegel 65 dB SPL):                                                |
| Freiburger Zahlen: 0-100 %                                                                            |
| Freiburger Einsilber: 0-100 %                                                                         |
| Mainzer Kindersprachtest (I/II/III): 0-100% / nicht erhoben                                           |
| Göttinger Sprachverständnistest (I/II): 0-100% /nicht erhoben                                         |
| Reimtest OIKi: 0-100% / nicht erhoben                                                                 |
| <u>Satztests (FF, SON0) mit CI, Sprachpegel 65 dB SPL (Einfachauswahl)</u>                            |
| OISa in Ruhe: 0-100% / nicht erhoben                                                                  |
| OISa Schwelle im Störgeräusch (SRT50): -30 bis +30 dB SNR / nicht erhoben                             |
| GöSa in Ruhe: 0-100% / nicht erhoben                                                                  |
| GöSa Schwelle im Störgeräusch (SRT50): -30 bis +30 dB SNR / nicht erhoben                             |
| HSM in Ruhe: 0-100%/nicht erhoben                                                                     |
| HSM Störgeräusch: 0-100 %/nicht erhoben                                                               |
| HSM SNR: -5, 0, +5, +10 dB/nicht erhoben                                                              |
| OIKiSa in Ruhe: 0-100% / nicht erhoben                                                                |
| OIKiSa im Störgeräusch (SRT50): -30 bis +30 dB / nicht erhoben                                        |

|                                                                                                          |
|----------------------------------------------------------------------------------------------------------|
| <b>9. Hör- /Sprachentwicklung (Kinder)</b>                                                               |
| Verwendung alternativer Kommunikationsmethoden (z.B. DGS, GUK, Talker): ja / nein / nicht erhoben        |
| Auditive Wahrnehmungsentwicklung (z.B. Elternfragebogen): unauffällig / auffällig / nicht erhoben        |
| Kommunikative Entwicklung (z.B. Elternfragebogen): unauffällig / auffällig / nicht erhoben               |
| Fortschritt der Hör- /Sprachentwicklung: regelhaft / nicht regelhaft / nicht erhoben                     |
| Status Sprachverständnis: unauffällig / auffällig / nicht erhoben                                        |
| Status Phonetik-Phonologie: unauffällig / auffällig / nicht erhoben                                      |
| Status Lexikon-Semantik: unauffällig / auffällig / nicht erhoben                                         |
| Status Syntax-Morphologie: unauffällig / auffällig / nicht erhoben                                       |
| Status Kommunikation-Pragmatik: unauffällig / auffällig / nicht erhoben                                  |
| Sinnesspezifische Förderung / vorbeugende Maßnahme erfolgt derzeit: ja / nein / unbekannt/ nicht erhoben |
| Pädagogische Einrichtung/Schule: Regel-Kindergarten / Regelschule / andere Einrichtungen / nicht erhoben |

|                                                                     |
|---------------------------------------------------------------------|
| <b>10. Lebensqualität</b>                                           |
| Fragebogen zur Lebensqualität erhoben: NCIQ/ andere / nicht erhoben |
| Elementare Schallwahrnehmung NCIQ1 (0-100)                          |
| Sprach- und Musikwahrnehmung NCIQ2 (0-100)                          |
| Kontrolle der eigenen Stimme NCIQ3 (0-100)                          |
| Psychosoziale Folgen NCIQ4 (0-100)                                  |
| Aktivitätsverhalten NCIQ5 (0-100)                                   |
| Soziale Kontakte NCIQ6 (0-100)                                      |
| NIIQ Gesamtscore NCIQTotal (0-100)                                  |
